# Supplementary material for: Xiaoyaosan Exerts Antidepressant Effect by Downregulating RAGE Expression in Cingulate Gyrus of Depressive-Like Mice
Source: Frontiers journal article supplement (doi:10.3389/fphar.2021.703965), 2021-09-07
Supplement: Data_Sheet_1.pdf [file Data_Sheet_1.pdf]

## **Supplementary materials**

### **1. Sample preparation**

The rats were given Xiaoyaosan (XYS) by intragastric administration, and the blood was collected from abdominal aorta 1 hour and 6 hours later. The blood was kept at room temperature for 30 minutes and centrifuged at 3000 g for 10 minutes. The supernatant was taken and stored at - 80 °C for detection.

### **2. High-performance liquid chromatography-mass spectrometry (HPLC-MS)**

Take 200  $\mu$ L serum and 400  $\mu$ L acetonitrile mixed and vortexed for 30s. After centrifugation at 13,000 rpm for 10 mins at 4°C, the supernatant was loaded to HPLC-MS for fingerprint analysis (Zhu et al., 2014).

HPLC-MS/MS analysis was performed with an API 4000-QTRAP® LC-MS/MS System (AB SCIEX, Framingham, MA, USA). A Zorbax Eclipse C<sub>18</sub> column (50 × 2.1 mm, i.d. 3.5  $\mu$ m, Agilent, USA) was used for chromatographic separations. Column temperature was maintained at 40 °C. The samples were separated using a gradient mobile phase consisting of CHOH (a) and H<sub>2</sub>O-HCOOH (b) (100:0.1,v/v). The flow rate was 0.3 mL/min. About 10  $\mu$ L of the sample solution was injected in each run. HPLC effluent was introduced directly to the electrospray source operated in a positive ionization mode and connected to a triple quadrupole mass spectrometer.

The compound was ionized in the electrospray ionization operated in the positive mode. Ionizing voltage was 5000 V, and ion source temperature was 600 °C. Curtain gas: 30, GS1: 60, GS2: 60. Total ion current chromatograms were obtained by a mass spectrometer in multiple monitoring modes. The ion pairs used for the qualitative analysis were m/z 315.2 →

$m/z$  300.3 and  $m/z$  315.2  $\rightarrow$   $m/z$  151.2 (isorhamnetin);  $m/z$  193.6  $\rightarrow$   $m/z$  135.6 and  $m/z$  193.6  $\rightarrow$   $m/z$  150.5 (ferulic acid);  $m/z$  353.8  $\rightarrow$   $m/z$  191.7 and  $m/z$  353.8  $\rightarrow$   $m/z$  86.0 (chlorogenic acid); and  $m/z$  783.5  $\rightarrow$   $m/z$  622.5 and  $m/z$  783.5  $\rightarrow$   $m/z$  652.4 (astragaloside). Software Analyst<sup>®</sup> 1.5 was used for controlling the instruments and data collection and processing.

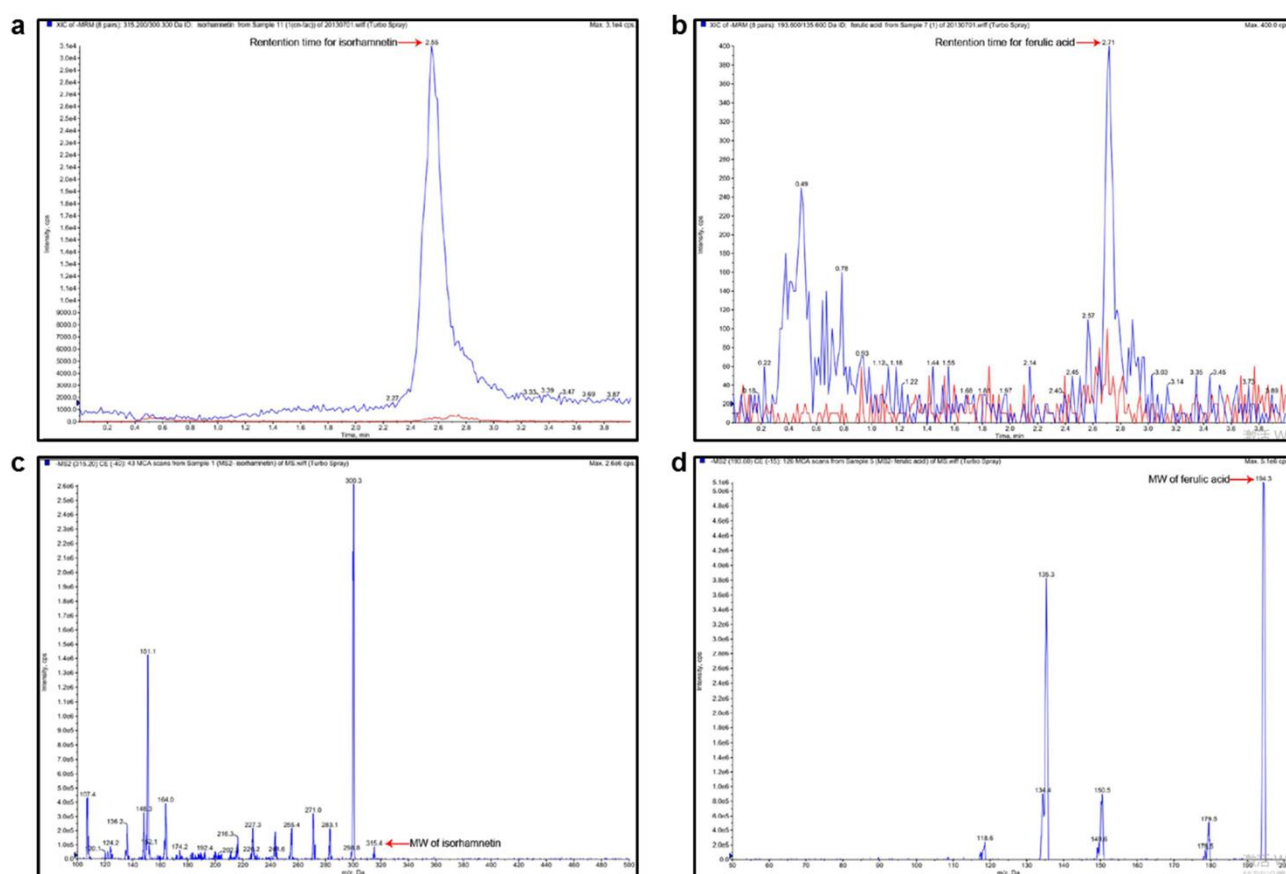

**Figure S1.** Determination of isorhamnetin and ferulic acid in Xiaoyaosan by HPLC-MS/MS.

Serum sample from a rat 1 h after intragastric administration of 1.9 mg/kg YYS. (a) The retention time for isorhamnetin by HPLC-MS/MS was 2.55 min. (b) Serum sample was from a rat 6 h after YYS treatment. The retention time for ferulic acid was 2.71 min. The corresponding molecular weights of isorhamnetin

(c) and ferulic acid (d) were determined by HPLC-MS/MS.

### 3. The results of $RAGE^{-/-}$ mice identification

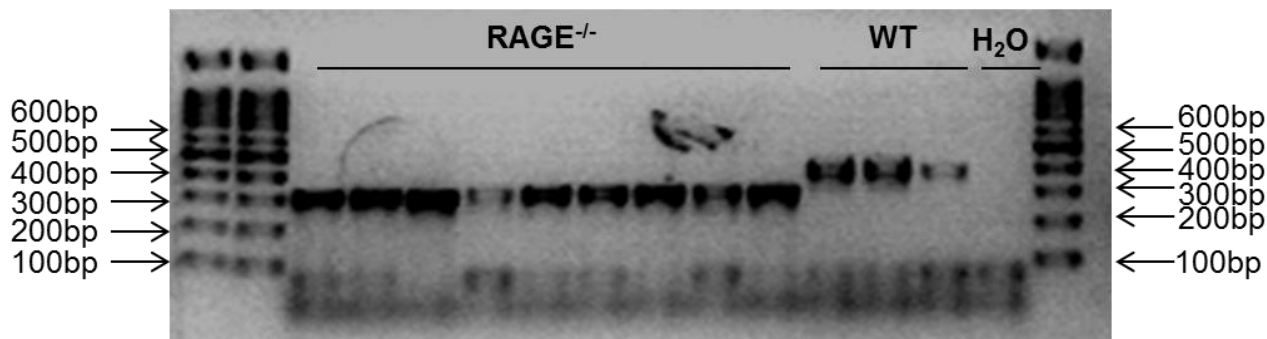

**Figure S2.** The gene identification results of mice. Wild type (WT) = 310 bp, RAGE-null mice ( $RAGE^{-/-}$ ) = 290 bp.

Zhu, X., Xia, O., Han, W., Shao, M., Jing, L., Fan, Q., Liu, Y., Diao, J., Lv, Z., and Sun, X. (2014). Xiao Yao San Improves Depressive-Like Behavior in Rats through Modulation of beta-Arrestin 2-Mediated Pathways in Hippocampus. *Evid Based Complement Alternat Med.* 2014, 902516. doi: 10.1155/2014/902516
